# Supplementary material for: Revisiting the Genetic Ancestry of Brazilians Using Autosomal AIM-Indels
Source: PubMed Central journal article supplement (PMC3779230; doi:10.1371/journal.pone.0075145), 2013-09-20
Supplement: pone.0075145.s005.pdf [file pone.0075145.s005.pdf]

**Table S5.** Demographic significance of the sampled populations based in 2010 IBGE data for Brazilian Regions and States.

|                         | Total population (IBGE) | Population representation | (%)    |
|-------------------------|-------------------------|---------------------------|--------|
| Santa Isabel (Amazonas) | 18146                   | 11083182                  | 70%    |
| Manaus (Amazonas)       | 3483985                 |                           |        |
| Belém (Pará)            | 7581051                 |                           |        |
| <b>North</b>            | 15864454                |                           |        |
| Pernambuco              | 8796448                 | 11916942                  | 22%    |
| Alagoas                 | 3120494                 |                           |        |
| <b>Northeast</b>        | 53081950                |                           |        |
| Mato Grosso do Sul      | 2449024                 | 2472024                   | 18%    |
| Terena                  | 23000                   |                           |        |
| <b>Center-West</b>      | 14058094                |                           |        |
| Minas Gerais            | 19597330                | 80364410                  | 100% * |
| Espírito Santo          | 3514952                 |                           |        |
| Rio de Janeiro          | 15989929                |                           |        |
| São Paulo               | 41262199                |                           |        |
| <b>Southeast</b>        | 80364410                |                           |        |
| Paraná                  | 10444526                | 27386891                  | 100% * |
| Santa Catarina          | 6248436                 |                           |        |
| Rio Grande do Sul       | 10693929                |                           |        |
| <b>South</b>            | 27386891                |                           |        |
| <b>Brasil</b>           | 190755799               | 133223449                 | 69%    |

\* excluding non-sampled Amerindian and Afro-descendant communities
